# Supplementary material for: Remuneration of primary dental care in England: a qualitative framework analysis of perspectives of a new service delivery model incorporating incentives for improved access, quality and health outcomes
Source: PubMed Central journal article supplement — BMJ Open. 2019 Oct 3;9(10):e031886. doi: 10.1136/bmjopen-2019-031886 (PMC6797242; doi:10.1136/bmjopen-2019-031886), 2019-10-03
Supplement: bmjopen-2019-031886.draft_revisions.pdf [file bmjopen-2019-031886.draft_revisions.pdf]

# BMJ Open

BMJ Open is committed to open peer review. As part of this commitment we make the peer review history of every article we publish publicly available.

When an article is published we post the peer reviewers' comments and the authors' responses online. We also post the versions of the paper that were used during peer review. These are the versions that the peer review comments apply to.

The versions of the paper that follow are the versions that were submitted during the peer review process. They are not the versions of record or the final published versions. They should not be cited or distributed as the published version of this manuscript.

BMJ Open is an open access journal and the full, final, typeset and author-corrected version of record of the manuscript is available on our site with no access controls, subscription charges or pay-per-view fees (<http://bmjopen.bmj.com>).

If you have any questions on BMJ Open's open peer review process please email [info.bmjopen@bmj.com](mailto:info.bmjopen@bmj.com)

# BMJ Open

## Remuneration of primary dental care in England: perspectives of a new service delivery model incorporating incentives for improved access, quality and health outcomes

|                               |                                                                                                                                                                                                                                                                                                                                                                                                                                                                                                                   |
|-------------------------------|-------------------------------------------------------------------------------------------------------------------------------------------------------------------------------------------------------------------------------------------------------------------------------------------------------------------------------------------------------------------------------------------------------------------------------------------------------------------------------------------------------------------|
| Journal:                      | <i>BMJ Open</i>                                                                                                                                                                                                                                                                                                                                                                                                                                                                                                   |
| Manuscript ID                 | bmjopen-2019-031886                                                                                                                                                                                                                                                                                                                                                                                                                                                                                               |
| Article Type:                 | Original research                                                                                                                                                                                                                                                                                                                                                                                                                                                                                                 |
| Date Submitted by the Author: | 29-May-2019                                                                                                                                                                                                                                                                                                                                                                                                                                                                                                       |
| Complete List of Authors:     | Robinson, Peter; University of Bristol, School of Oral and Dental Sciences<br>Douglas, Gail; University of Leeds, School of Dentistry<br>Gibson, Barry; University of Sheffield, School of Clinical Dentistry<br>Godson, Jenny; Public Health England, Dental Public Health ; University of Leeds, School of Dentistry<br>Vinall-Collier, Karen; University of Leeds, School of Dentistry<br>Pavitt, Sue; University of Leeds, School of Dentistry<br>Hulme, Claire; University of Exeter, Health Economics Group |
| Keywords:                     | Commissioning, dental, oral health, contract, incentives, behaviour change                                                                                                                                                                                                                                                                                                                                                                                                                                        |
|                               |                                                                                                                                                                                                                                                                                                                                                                                                                                                                                                                   |

SCHOLARONE™  
Manuscripts

1  
2  
3  
4 **Remuneration of primary dental care in England: perspectives of a new service delivery**  
5 **model incorporating incentives for improved access, quality and health outcomes**  
6  
7  
8

9 Prof Peter Robinson, Bristol Dental School, University of Bristol, Bristol, UK

10  
11 Prof Gail Douglas, School of Dentistry, University of Leeds, Leeds, UK

12  
13  
14 Dr Barry Gibson, School of Clinical Dentistry, University of Sheffield, Sheffield, UK

15  
16 Dr Jenny Godson, Public Health England, Leeds, UK

17  
18 Dr Karen Vinall-Collier, School of Dentistry, University of Leeds, Leeds, UK

19  
20 Prof Sue Pavitt, School of Dentistry, University of Leeds, Leeds, UK

21  
22  
23 \*Prof Claire Hulme, Institute of Health Research, University of Exeter, Exeter, UK

24  
25  
26  
27  
28  
29 **\*Corresponding author:** Prof Claire Hulme, Institute of Health Research, University of Exeter Medical  
30 School, St Luke's Campus, Exeter EX1 2LU. [c.t.hulme@exeter.ac.uk](mailto:c.t.hulme@exeter.ac.uk) 01392 72 2902  
31  
32

33  
34  
35 Key words: Commissioning, Dental, Oral Health, Incentives, Behaviour Change

36  
37 Word count: 3994  
38  
39  
40  
41  
42  
43  
44  
45  
46  
47  
48  
49  
50  
51  
52  
53  
54  
55  
56  
57  
58  
59  
60

## Abstract

Objective: To describe stakeholder perspectives of a new service delivery model in primary care dentistry incorporating incentives for access, quality and health outcomes

Design: Observations, interviews and focus groups

Setting: Six UK primary dental care practices, three working under the incentive-driven contract and three working under the traditional activity based contract

Participants: Observations were made of 30 dental appointments. Eighteen lay people, 15 dental team staff and a member of a commissioning team took part in the interviews and focus groups.

Results: Using a qualitative framework analysis informed by Andersen's model of access we found oral health assessments influenced patients' perceptions of need, which led to changes in preventive behaviour. Dentists' responded to the contract, with greater emphasis on prevention, use of the disease risk ratings in treatment planning, adherence to the pathways and the utilisation of skill-mix. Participants identified increases in the capacity of practices to deliver more care as a result. These changes were seen to improve evaluated and perceived health and patient satisfaction. These outcomes fed back to shape people's predispositions to visit the dentist.

Conclusion: The incentive driven contract was perceived to increase access to dental care, determine dentists' and patients' perceptions of need, their behaviours, health outcomes and patient satisfaction. Dentists face challenges in refocussing care, perceptions of preventive dentistry, deployment of skill mix and use of the risk assessments and care pathways. Dentists may need support in these areas and to recognise the differences between caring for individual patients and the patient-base of a practice.

### Strengths and limitations of this study

- The research shows that incentive-driven contracting can influence access to dental care and shape predispositions to visit the dentist.
- Increased skill mix can improve the availability of care and patient satisfaction; however, changes in skill-mix are exquisitely sensitive to contracting and practice finance.
- Whilst NHS dental contracting in the UK is currently under-going an evolution, the contracts described in this study were forerunners of these new incentive-driven contracts and the findings remain directly relevant.
- Use of the Andersen model of access was broadly sustained in the data but might be enhanced by greater conceptual clarity.

## Introduction

Commissioning of NHS dentistry in England is moving away from volume-based contracts with payment for units of dental activity (UDA) to an approach that rewards quality and oral health improvement alongside activity<sup>1</sup>. Payments recognise prevention and reward the contribution of the dental team to improved oral health, reflected in patient progression along care pathways, adherence to nationally agreed clinical guidelines and the achievement of expected outcomes<sup>1</sup>. The Department of Health and Social Care (DHSC) dental contract reform programme opened a series of pilots in 2011, subsequently followed by on-going prototype systems, to explore a shift from treatment and repair to prevention and improved oral health via a new clinical pathway and new remuneration models<sup>2,3</sup>. Whilst the impact of these contracts on process has been investigated, limited evidence exists on their effect on oral health outcomes and patient, commissioner and workforce acceptability.

The care pathway in the pilots and prototypes begins with an oral health assessment (OHA)<sup>3,4</sup> designed to enable more prevention within personalised care plans, taking into account patients' social and dental histories and clinical status. Patients are then advised of their oral risk status using a red/amber/green rating (RAG) rating, given preventive advice and a follow up or review based on their risk status. The RAG tool allows dentists to perform detailed and consistent assessments that, in turn, direct delivery of care appropriate to needs and aids communication with patients. Evaluation of the pilots reported patient and practitioners views of the new clinical pathway to be strongly supportive<sup>5</sup>. However, evidence on the effectiveness of use of contracting and incentives in health providers is still emerging and is mixed.<sup>6-9</sup> Within dentistry, changes to incentive structures, towards a fee for service model increased activity and influenced dentists to target UDAs by shifting towards treatments with high rewards rather than prescribing on the basis of need<sup>10,11</sup>. However, a recent review found low level evidence and concluded that changes to remuneration may change clinical activity in primary care dentistry but further experimental research is needed<sup>12</sup>. Furthermore, there is little literature regarding care pathways in primary dental care<sup>13</sup>. Findings from the national dental contract pilots, suggested small improvements in risk reduction over the short-term<sup>14</sup>. The new prototypes are undergoing evaluation<sup>14</sup>.

Another potential advantage of a new dental contract would be more effective use of skill-mix. Dental hygienists/therapists may provide treatments such as scaling and polishing, oral health promotion, fissure sealants and fillings on all patients and pulp treatment/stainless steel crowns and extractions on children. The potential contribution of dental therapists to reduce costs and increase access to care

1  
2  
3 is considerable. Whilst there are few hard data to support skill-mix in dentistry<sup>15</sup>, approximately 60 –  
4 70% of dentists are prepared to consider employing a therapist although some dentists remain unclear  
5 of their roles<sup>16-18</sup>.  
6  
7  
8  
9

10 In 2007 a new incentive-driven contract (INCENTIVE) intended to promote evidence-based preventive  
11 interventions, widen access to dentistry and encourage the use of skill mix was introduced in three  
12 primary care dental practices in West Yorkshire. The practices were in areas of high oral health need  
13 and with high demand for NHS dental care. Whilst it pre-dated the national dental contract pilots and  
14 prototypes, the specification of the INCENTIVE model reflected the same ethos and recommendations,  
15 with several features identical. Like the prototypes, the INCENTIVE model blended incentives to  
16 demonstrate quality, oral health improvements and volume of service. Most of its contract value (60%)  
17 was attributed to the delivery of UDAs, with the remainder equally divided between quality (including  
18 systems, processes and infrastructure) and oral health improvement via implementation of Delivering  
19 Better Oral Health<sup>19</sup>. The model also employed the same OHA care pathway.  
20  
21  
22  
23  
24  
25  
26  
27  
28  
29

30 Our overall aim was to evaluate the incentive driven model of dental service provision implemented  
31 in West Yorkshire in the North of England. Our objectives were to (i) explore stakeholder perspectives  
32 of the new service delivery model, (ii) assess its effectiveness and (iii) assess its cost-effectiveness.  
33 This manuscript reports on the first objective; details of the effectiveness and cost effectiveness  
34 evaluation can be found elsewhere<sup>20-21</sup>.  
35  
36  
37  
38  
39

## 40 **Methods**

41  
42 This qualitative study focused on the three INCENTIVE practices and three comparator dental practices  
43 working under traditional UDA contracts (TRADITIONAL practices). The TRADITIONAL were matched  
44 with the INCENTIVE practices by deprivation index, age profile, size of practice and ethnicity.  
45  
46  
47

48 Data were collected in focus groups and semi-structured interviews, supplemented with observations  
49 of dental appointments of the delivery of dental care. Purposive sampling via a sampling matrix  
50 supported recruitment of participants with different experiences of the model. The three stakeholders  
51 groups were lay people (patients and non-patients), dental teams (dental practitioners, dental care  
52 professionals and practice managers) and service commissioners.  
53  
54  
55  
56

57 Encounters were observed in two INCENTIVE and two TRADITIONAL practices. Staff were sampled so  
58 that similar numbers (15 each) of dentists and dental hygienist/ therapists were observed. All eligible  
59  
60

1  
2  
3 adult patients (18 years or over) with appointments on the observation day were invited to participate.  
4  
5 Two weeks before their appointments, patients were sent a letter informing them of the study, a study  
6  
7 information leaflet and consent form. Patients who expressed interest in participating were given the  
8  
9 opportunity to ask any questions and give consent on the day of their appointment. The 'non-  
10  
11 participant' observer attended appointments passively at a distance close enough to hear the  
12  
13 conversation to take comprehensive field notes. A brief analysis of observations was conducted as soon  
14  
15 as possible after the observation (the same or following day).

16  
17 Observations were followed by interviews on the same day with four dentists and four dental  
18  
19 hygienists/therapists. Staff commented on the encounters and shared their views on what had taken  
20  
21 place. Questions asked at the post-observation interview were influenced by the nature of the activity  
22  
23 in the encounters, the team member's attitude, expectations and impressions and reflections of the  
24  
25 experience. Interviews were recorded and transcribed verbatim.

26  
27 Interviews were also conducted with patients, other lay people, commissioners and dental team  
28  
29 members. Lay people were recruited in two ways: (i) practices mailed information packs to patients;  
30  
31 (ii) Focus groups were held with groups attending a community centre, including one for parents with  
32  
33 young children and another for older residents. In addition, snowball sampling entailed existing  
34  
35 participants passing the study information and the researcher's contact details on to acquaintances.  
36  
37 Participants should be aged 16 years and over. People with no natural teeth were excluded.

38  
39 Interviews and focus groups followed a topic guide, partly informed by the theoretical framework and  
40  
41 supplemented with themes that emerged from the observations and previous interviews. Interviews  
42  
43 with dental team members took place at the dental surgery, while interviews with patients took place  
44  
45 in patient's homes. All were recorded and transcribed verbatim. Interviews lasted between 15 and 70  
46  
47 minutes.

48  
49 The Andersen Behavioural model of access was employed as the theoretical framework for the  
50  
51 qualitative analysis (Figure 1). The model sees access as *'the use of personal health services and  
52  
53 everything that facilitates or impedes their use'*<sup>22</sup>.

54  
55 The model has evolved in line with advances in understanding to incorporate the interaction between  
56  
57 individual, health care system and external environment<sup>22-24</sup>. Later versions introduced health and  
58  
59 patient satisfaction as desirable outcomes, said to be determined by predisposing and enabling factors,  
60  
behaviours and need. Many studies in health care, including dentistry, support its use (e.g.<sup>25-26</sup>).

**FIGURE 1 HERE**

People may be predisposed to accessing care as a result of their demographic factors, social environment and beliefs. Enabling factors include policies, facilities, staff finance, and the organisation of services that might influence utilisation<sup>24</sup>. From this perspective the INCENTIVE contract is an enabling factor with policy, financial and organisational facets<sup>1,3,19</sup>. Health needs may include health education, disease prevention, diagnosis, treatment, rehabilitation and palliative care. Andersen distinguished between evaluated (professionally defined, or normative) and perceived (personally defined or felt) need. In turn, these components could influence personal and professional health behaviours. Personal behaviours are activities that shape health status, such as oral hygiene, diet and tobacco use. Health service use is treated as behaviour in itself. Professional behaviours relate to processes such as health education, communication and prescribing. The maintenance and improvement of health should be the primary outcome of access, thus the outcomes are (patient) perceived and (clinician) evaluated health status and patient satisfaction. An important feature of the model is its recursive nature with feedback loops so that the outcomes of access may influence future predisposing and enabling factors, population needs and use of services.

Framework analysis was used to induce the results from the original accounts within the structured policy focus of the research<sup>27</sup>. Our intention was to explore the effect of the contract as an enabling factor, interacting with other stages of the model. While Andersen's model guided the analysis, it was refined as required to identify the thematic framework. Data were indexed and charted under subheadings derived from the framework to enable a process of constant comparison across themes and cases. Thus, the framework analysis served to either confirm or to challenge the model, with deviant case analysis used to add new categories or revise it. The validity of the findings was supported by discussion of interim and final results for triangulation and corrections with participants in focus groups. The results were also compared against existing knowledge, such as the evaluations of the NHS Dental Contract Pilots<sup>5</sup>.

***Patient and Public Involvement (PPI)***

Throughout the research cycle and patient contributors worked as integral members of the research team from conception of the research idea to shape our research questions and aid delivery, project management and final data interpretation through to reporting. They ensured our research was of relevance to patients and the NHS. Specifically patient contributors: Helped identify and prioritise the



1  
2  
3 research questions and develop the research design. (e.g. the sampling matrix was co-designed); were  
4 members of the study advisory group; and co-developed participant information leaflets and  
5 dissemination materials.  
6  
7  
8  
9

## 10 **Results**

11  
12  
13 Data were collected between August 2012 and February 2014. Observations were made of 30 dental  
14 appointments. Eighteen lay people, 15 dental team staff (four traditional practice dentists, 8  
15 INCENTIVE dentists, 2 practice managers and a dental therapist) and a member of the commissioning  
16 team took part in the interviews and focus groups. The results are presented in two stages. First, the  
17 major themes in the data are outlined. Secondly, the interactions between enabling and other factors  
18 are described.  
19  
20  
21  
22

### 23 **Major themes**

24  
25  
26  
27 The Andersen Framework was largely sustained in the data, with the only revision being the addition  
28 of trust as an outcome of access. Predisposing factors could be characterised as demographic and  
29 social characteristics and beliefs. For example, family commitment could facilitate or hamper service  
30 utilisation. Enabling factors fell into three sub themes of health policy, finance and organisations. The  
31 influence of health policy between the extremes of the changes associated with implementation of  
32 the INCENTIVE model right through to an apparent lack of policy in some TRADITIONAL practices. A  
33 key part of the contract was dentists' remuneration. Traditional models were problematic for complex  
34 cases, whereas INCENTIVE practices focused on the costs of OHAs and building relationships with  
35 patients that would enable more prevention. Computing problems featured as organisational factors,  
36 and in particular the practice software, which had not been adapted to INCENTIVE.  
37  
38  
39  
40  
41  
42  
43

44  
45 Evaluated and environmental need and population health indicators were manifest in the data. Two  
46 localities in the study are characterised by material deprivation, poor oral health and long-standing  
47 under-supply of care. Unsurprisingly, this influenced dental treatment needs.  
48  
49

50  
51 An example of professional behaviour involved formally assessing patients' risk of disease. Dental  
52 team members commented on the relative imprecision of the traffic light system and its three  
53 categories. Indeed attitudes and practices towards prevention varied appreciably among the dental  
54 teams with one dentist noting: *I do find it hard to talk about their health – I'm trained to drill and fill.*  
55  
56

57  
58 Health outcomes and satisfaction appeared in the data, as did the concept of trust. One INCENTIVE  
59 patient noted: *I do trust them here – they treated me, gave me root canal treatment and saved my*  
60

1  
2  
3 *tooth, without them, I'd have been minus a few teeth and my appearance would not have been*  
4  
5 *good.*

### 7 **Interactions**

10 The INCENTIVE contract changes the finance and organisation of dental practices to implement  
11 health policy. Its effects can therefore be seen as interactions between these enabling factors and  
12 other stages in the model. This can be seen in enabling and pre-disposing factors and need.

15 INCENTIVE practices had been located based on *"a robust oral health needs assessment prior to*  
16 *commissioning these practices and we'd looked very closely at equity in terms of access to dental*  
17 *care"* (Service Commissioner). For some participants, the INCENTIVE practices marked a shift from  
18 *no* dental care, whereas others moved from private to NHS provision. The new services suited  
19 participants' needs in terms of location, personnel and ease of getting an appointment.  
20  
21  
22

24 Effects of the INCENTIVE contract were evident on the processes of care, personal health practices  
25 and the use of personal health resources. In turn, the process of delivering care appeared to be  
26 affected in three ways, 1] by the use of the care pathway underpinned by the risk assessment/ RAG;  
27 2] by increasing prevention communication and 3] multidisciplinary approach through wider use of  
28 skill mix. Of interest the communication of the RAG ratings was not always apparent in the  
29 observations and was being used solely by some of the clinicians to document progress.  
30  
31  
32  
33

35 Participants reflected on their experiences with the pathways. Benefits included the clear link  
36 between the risk assessment and care pathways. The INCENTIVE contract embedded DHSC guidance<sup>26</sup>  
37 so that prevention became valued standard procedure. Practitioners felt that it gave them time and  
38 space to care for patients. For example, one INCENTIVE dentist noted: *Red, amber or green and then*  
39 *they do get the fluoride varnish, the smoking cessation and alcohol use is being taken automatically.*  
40 This could be contrasted directly with the TRADITIONAL practices. There was an example of where the  
41 focus of care in the incentive contract had penetrated a TRADITIONAL practice, causing them to reflect  
42 on their processes of care: *We are pushed towards UDAs rather than improving oral health... The*  
43 *prevention emphasis is an issue – we are expected to talk about perio disease and smoking and diet*  
44 *and have to squeeze that in.*  
45  
46  
47  
48  
49  
50  
51

52 The INCENTIVE practices were not mandated to use multidisciplinary teams, but did so to deliver  
53 preventatively focused care. One approach was for dentists to examine patients and formulate  
54 treatment plans, but some practices did not deduct the value of the delegated treatment from dentists'  
55 incomes:  
56  
57  
58  
59  
60

1  
2  
3                   *They readily work with each other. I mean our therapist and the hygienist are generally busy*  
4                   *the whole day, . . . we pay them on a fixed rate and the therapists are very happy with that*  
5                   *because they've got full time work, they're busy, the associates are happy because they're*  
6                   *not having to pay for them ..., the patients get benefit because they get access to a therapist,*  
7                   *... it may cost more for us to do it but it's a more sensible way of running a business because*  
8                   *everybody is working together for the same aim*  
9  
10  
11  
12  
13  
14

15           The new contractual arrangements were seen to influence personal health practices and the use of  
16           personal health resources. They also influenced outcomes of perceived and evaluated health and  
17           patient satisfaction. Moreover, the interactions could ripple throughout the model to have far-  
18           reaching effects. For example the RAG ratings could influence patients' perceptions of their own needs,  
19           leading to personal behaviour changes and satisfaction (an outcome). As one INCENTIVE patient said:  
20           *I think it's good because if you know, if someone says to you, you know on this rating you are more at*  
21           *risk, you're more likely to do something about it aren't you, as opposed to someone not saying anything*  
22           *to you...* For dentists use of the ratings to determine recall intervals liberated more time for the process  
23           of care and allowed observation of increased health but influenced patient satisfaction both positively  
24           and negatively which suggests a need to reconcile contrasting views: the ability to increase access and  
25           longer intervals between assessments. In a wholly positive example, one INCENTIVE patient satisfied  
26           with her own care encouraged her partner to attend so that professional behaviour enhanced  
27           satisfaction to change predisposing factors to increase access to care.  
28  
29  
30  
31  
32  
33  
34  
35  
36  
37

### 38           **Discussion**

39  
40           This study has described stakeholders' views of the INCENTIVE contracting arrangements. The ratings  
41           from OHAs influenced patients' perceptions of need, which led to changes in preventive behaviour.  
42           Dentists' had responded to the contract in the desired direction with greater emphasis on prevention,  
43           use of the ratings in treatment planning, adherence to the pathways and the utilisation of skill-mix.  
44           Participants identified increases in the capacity of practices to deliver more care as a result. These  
45           changes were seen to improve evaluated and perceived health and patient satisfaction. These findings  
46           are compatible with the first year evaluations of the NHS dental contract pilots where almost three  
47           quarters of patients said they had a better understanding of their oral health and had changed their  
48           behaviour<sup>5</sup>. Furthermore, analysis of OHAs and reviews suggested that RAG ratings improved for small  
49           numbers of patients, within two years<sup>4</sup>. Better health and satisfaction increased the predisposition to  
50           visit the dentist. These findings demonstrate the potential for a new contract to increase access and  
51           to improve health.  
52  
53  
54  
55  
56  
57  
58  
59  
60

1  
2  
3 Whilst these data are encouraging for continued contract reform, several areas were identified as  
4 requiring more consideration, where NHS England, dental teams and the public may need more  
5 support. The practices had been placed in areas of high need. As well as meeting immediate needs,  
6 the *perception* of low availability of care may also be a barrier to access in areas that have been  
7 underserved in the past. Evidence of new services is therefore needed to break this cycle. The results  
8 also demonstrate direct benefits of the needs-led local service commissioning of the 2006 dental  
9 contract<sup>28-29</sup>. Such local knowledge is less well utilised in the current NHS England single operating  
10 model for practice commissioning<sup>30</sup>, which may render the system less responsive.

11  
12  
13  
14  
15  
16  
17 Participants at INCENTIVE practices reported professional and lay preventive behaviours leading to  
18 better evaluated and perceived health. However, there were concerns over offering preventive advice,  
19 the complexities of accounting for the patient's context, the time this took and the difficulties of  
20 effective prevention, especially in areas with high levels of disease. These aspects of dentistry are  
21 often presented as problems, sometimes beyond the scope of practitioners, rather than part of their  
22 job<sup>16</sup>. This is a key issue if dentistry is to refocus on prevention. These and other data indicate that  
23 change is possible if it is encouraged by the right contractual model. Education may also be required  
24 to support contractual drivers. Neither one alone is likely to be sufficient. A Cochrane Review<sup>31</sup>  
25 concluded that educational meetings had a small effect on professional practice and health outcomes  
26 but the effects were likely to be smaller still for complex behaviours. Both a systematic review of  
27 incentives to follow best practice in health care and a Cochrane review of the effect of remuneration  
28 on primary care dentists' behaviour cited within it<sup>12,32</sup> concluded that financial incentives can have a  
29 'modest' effect on improving the quality of healthcare.

30  
31  
32  
33  
34  
35  
36  
37  
38  
39  
40 The emphasis on OHAs and pathways was a key feature of INCENTIVE and the DHSC contract pilots  
41 and subsequent prototypes<sup>5</sup>. Some patients were not aware of the RAG ratings; others perceived them  
42 to alert them to their preventive needs and to be a motivator. We specifically enquired about the RAG  
43 ratings when triangulating the data in focus groups with dental staff. There was near universal use of  
44 the ratings as a decision aid (as evident in the data), but their use in patient communication had  
45 decreased over time. Dental teams may need clarification of whether and how the ratings are  
46 supposed to be communicated to patients. The small number of rating categories concerned some  
47 dentists, especially for patients with immutable risk factors such as general health problems. Dentists'  
48 concerns might be alleviated by the addition of new categories. Alternatively, they may become used  
49 to this system and gain confidence in over-riding the rules of the pathway. Their reluctance to do this  
50 may stem from the requirement to justify doing so. Dentists who engaged in the contract pilots  
51 requested reassurance about exercising clinical judgement in deviating from recommendations<sup>33</sup>, first  
52  
53  
54  
55  
56  
57  
58  
59  
60

1  
2  
3 that there would be no medico-legal repercussions provided there was evidence of clinical justification;  
4 and second, that they would not be penalised contractually.  
5  
6

7 Dental therapists increased the availability of care and patient satisfaction. However, the use of skill-  
8 mix is exquisitely sensitive to contracting and practice finance<sup>34</sup>. Practices had increased their  
9 utilisation of wider skill mix by not reducing the payments to dentists who delegated care. Paying two  
10 staff members for the shared treatment incentivised referral across the team and also liberated  
11 dentists' time for patient OHAs and more remunerative complex treatments. The impact of funding  
12 arrangements on dental practice is well known, and dentists must reconcile the business and other  
13 elements of their practices<sup>35</sup>. Dentists could see how the new contract carried the potential for  
14 greater value for money and reduce unnecessary treatment, but there were concerns that the time  
15 and costs of the OHAs had been under-estimated. This was also a concern in the dental contract pilots  
16 and was evident as reduced patient access<sup>33,36</sup>. This financial risk may be particularly relevant to new  
17 practices. The pilots were conducted in existing practices and experienced falls in access. However,  
18 the challenges may be even more severe in new practices (such as the INCENTIVE practices), where  
19 all the patients required initial assessments and were more likely to have high treatment needs  
20 necessitating more visits. This consideration goes further than dentists' incomes as concerns about  
21 costs were seen to influence practitioner behaviour. These concerns support the notion of assigning  
22 contract values according to patient needs, which in the contract prototypes is achieved by weighting  
23 the capitation element by patient characteristics of age and deprivation status<sup>36</sup>.  
24  
25  
26  
27  
28  
29  
30  
31  
32  
33  
34  
35

36 The Andersen Model provided a useful taxonomy for the data and allowed identification of the effects  
37 of the new contract. This fit is unsurprising as the model was developed over a forty-year period and  
38 remains amongst the most widely cited models of access to health care<sup>23,24,37,28</sup>. Theoretical models  
39 may be tested empirically or by looking for logical coherence<sup>39</sup>. The Andersen model is somewhat  
40 general with overlapping dimensions and others (e.g. social capital) not explicitly incorporated<sup>37</sup>. Very  
41 little is said about how demographic variables may exert effects and why<sup>38</sup>. A new factor in these data  
42 ('Trust') is not explicit in the model but could be regarded as both a belief and an outcome of care<sup>39</sup>.  
43 Dimensions also overlap in the model where dissimilar concepts are grouped together (personal  
44 health practices and health service use, perceived and evaluated health and satisfaction). This is  
45 important because empirical testing demands careful specification of inclusive relationships and to a  
46 certain extent this confounded testing of this model<sup>38</sup>. One consequence of this might be that the  
47 model yields very different results when cross national comparisons are made<sup>40</sup>.  
48  
49  
50  
51  
52  
53  
54  
55  
56  
57  
58  
59  
60

## Conclusion

The incentive-driven contract influenced access to dental care. Participants associated it with more access, greater use of skill mix and improved health outcomes. These outcomes fed back to shape predispositions to visit the dentist.

The policy context in which the INCENTIVE study was funded has remained remarkably constant ever since. The Steele Report of 2010<sup>1</sup> advocated commissioning to align dentistry with the rest of NHS services and to commission for health outcomes; to develop contracts rewarding activity, quality and oral health improvement. It recommended that payments explicitly recognise prevention and reward the contribution of the dental team to improvements to oral health, reflected in patient progression along the pathway, adherence to clinical guidelines and the achievement of expected outcomes<sup>1</sup>. The contract prototypes now being tested<sup>36</sup> retain the same ethos of shifting NHS dentistry towards prevention and oral health rather than treatment and repair through a new clinical pathway and new remuneration models. Despite pre-dating the Steele report the INCENTIVE contracts were forerunners of these new incentive-driven contracts. Thus, our findings remain directly relevant to the evolution of the NHS dental contract.

## References

1. Department of Health. NHS Dental Services in England. An independent review led by Professor Jimmy Steele. Department of Health London. 2009.
2. Department of Health. Dental Contract Reform: Prototypes. Overview Document. Department of Health: London. 2015 (January).
3. Department of Health. NHS Dental Contract: Proposals for Pilots. Department of Health London. 2010 (December).
4. Department of Health. NHS dental contract pilots - Learning after the first two years of piloting. Department of Health London. 2014(February).
5. Department of Health. NHS dental contract pilots - Early findings. Department of Health London. 2012(October).
6. Christianson J, Leatherman S, Sutherland K. Financial Incentives, Healthcare Providers and Quality Improvements. A review of the evidence. The Health Foundation: London. 2007.
7. O'Donnell CA, Ring A, McLean G, Grant S, Guthrie B, Gabbay M, Mair FS, Carlisle C, Heaney D, Sutton M, Watt GCM, et al. The new GMS contract in primary care: the impact of governance

- 1  
2  
3 and incentives on care. Final report. NIHR Service Delivery and Organisation programme;  
4 2011.  
5  
6  
7 8. Langdown C, Peckham S. The use of financial incentives to help improve health outcomes: is  
8 the quality and outcomes framework fit for purpose? A systematic review. *Public Health*.  
9 2014;36:251-8.  
10  
11 9. Maisey S, Steel N, Marsh R, Gillam S, Fleetcroft R, Howe A. Effects of payment for  
12 performance in primary care: qualitative interview study. *J Health Serv Res Policy*.  
13 2008;13(3):133-9.  
14  
15 10. Tickle M, McDonald R, Franklin J, Aggarwal V, Milsom K, Reeves D. Paying for the wrong kind  
16 of performance? Financial incentives and behaviour changes in National Health Service  
17 dentistry 1992-2009. *Community Dent Oral Epidemiol*. 2011;39(5):465.  
18  
19 11. Chalkley M. Incentives for Dentists in Public Service: Evidence from a Natural Experiment. *J*  
20 *Public Adm Res Theory*. 2010;20:i207-i23.  
21  
22 12. Brocklehurst P, Price J, Glenny AM, Tickle M, Birch S, Mertz E, et al. The effect of different  
23 methods of remuneration on the behaviour of primary care dentists. *Cochrane Database Syst*  
24 *Rev*. 2013;Nov 6(11):CD009853.  
25  
26 13. Hally JP, Pitts NB. Developing the first dental care pathway: the oral. *Prim Dent Care*. 2005  
27 Oct;12(4):117-21.  
28  
29 14. Department of Health. Dental Contract Reform: Evaluation of the first year of prototyping  
30 2016-2017. Department of Health: London. 2018 (May).  
31  
32 15. Galloway J, Gorham J, Lambert M. The Professionals Complementary to Dentistry: A  
33 Systematic Review and Synthesis. London: University College London; 2002.  
34  
35 16. Dyer T, Robinson PG. General Health Promotion in General Dental Practice – The Involvement  
36 of the Dental Team. Part 2 - A Qualitative and Quantitative Investigation of the Views of  
37 Practice Principals in South Yorkshire. *Br Dent J*. 2006;201(1):45-51.  
38  
39 17. Ross MK, Ibbetson RJ, Turner S. The acceptability of dually-qualified dental hygienist-  
40 therapists to general dental practitioners in South-East Scotland. *Br Dent J*. 2007;202(3):146-  
41 7.  
42  
43 18. Nilchian F, Rodd HD, Robinson PG. Influences on dentists' decisions to refer paediatric patients  
44 to dental hygienists and therapists for fissure sealants: a qualitative approach. *Br Dent J*.  
45 2009;207:E13.  
46  
47 19. Department of Health. Delivering better Oral Health - An evidence-based toolkit for  
48 prevention. London: Department of Health. 2009.  
49  
50  
51  
52  
53  
54  
55  
56  
57  
58  
59  
60



- 1  
2  
3  
4  
5  
6  
7  
8  
9  
10  
11  
12  
13  
14  
15  
16  
17  
18  
19  
20  
21  
22  
23  
24  
25  
26  
27  
28  
29  
30  
31  
32  
33  
34  
35  
36  
37  
38  
39  
40  
41  
42  
43  
44  
45  
46  
47  
48  
49  
50  
51  
52  
53  
54  
55  
56  
57  
58  
59  
60
20. Hulme C, Robinson PG, Saloniki EC, Vinall-Collier K, Baxter PD, Douglas G, Gibson B, Godson JH, Meads D. 2016. Shaping dental contract reform – a clinical and cost effectiveness analysis of incentive-driven commissioning for improved oral health in primary dental care. *BMJ Open* 2016;6:e013549 doi:10.1136/bmjopen-2016-013549
  21. Hulme C, Robinson P et al. INCENTIVE: Improving the organisation and delivery of dental health care to patients – innovation in commissioning and delivery of primary dental care service delivery and organisation. *NIHR HS&DR* 4(18) May 2016 DOI: <http://dx.doi.org/10.3310/hsdr04180>
  22. Andersen RM, Davidson PL. Ethnicity, aging, and oral health outcomes: A conceptual framework. *Adv Dent Res.* 1997;11(2):203-9.
  23. Andersen R. A behavioral model of families' use of health services. Chicago: Center for Health Administration Studies, University of Chicago.; 1968
  24. Andersen R. Revisiting the Behavioral Model and Access to Medical Care: Does it Matter? *J Health Soc Behav.* 1995;36(1):1-10.
  25. Goldsmith L. A Critical History of Andersen's Behavioral Model of Health Services Use: A Reflection of How We Study Access to Health Care. *Academy of Health Services Research and Health Policy.* 2002;19:6.
  26. Baker SR. Applying Andersen's behavioural model to oral health: what are the contextual factors shaping perceived oral health outcomes? . *Community Dent Oral Epidemiol.* 2009;37(6):485-94.
  27. Ritchie J, Lewis J. *Qualitative Research Practice: A guide for Social Science Students and Researchers.* Sage Publications Inc, London. 2003.
  28. Department of Health. *NHS Dentistry: Options for Change.* Department of Health London. 2002;B.
  29. Department of Health. *Primary Dental Care Services: Implementation of Local Commissioning.* Department of Health: London. 2005.
  30. NHS Commissioning Board. *Securing excellence in commissioning primary care.* June 2012. <https://www.england.nhs.uk/wp-content/uploads/2012/06/ex-comm-pc.pdf> Accessed 19.2.19
  31. Forsetlund L BA, Rashidian A, Jamtvedt G, O'Brien MA, Wolf FM, Davis D, Odgaard-Jensen J, Oxman AD. . Continuing education meetings and workshops: effects on professional practice and health care outcomes. *Cochrane Database Syst Rev.* 2009;15(2).
  32. Schaffer SK SJaFY. *Incentives to follow best practice in health care.* Office of Health Economics: London. 2015.



- 1  
2  
3 33. Department of Health. Dental Contract Reform Engagement Exercise: Detailed Findings. In:  
4 Health LDo, editor. 2015.  
5  
6 34. Brocklehurst PR, Tickel M. Is Skill Mix Profitable in the Current NHS Dental Contract in  
7 England? Br Dent J. 2011;210:303-8.  
8  
9 35. Harris R, Mosedale S., Garner J., Perkins E. What factors influence the use of contracts in the  
10 context of NHS dental practice? A systematic review of theory and logic model Soc Sci Med.  
11 2014;108(2014):54-9.  
12  
13 36. Department of Health. Dental Contract Reform: Prototypes Overview document.  
14 Department of Health: London 2015.  
15  
16 37. Baker SR. Applying Andersen's behavioural model to oral health: what are the contextual  
17 factors shaping perceived oral health outcomes? Community Dent Oral Epidemiol.  
18 2009;37(6):485-94.  
19  
20 38. Andersen R, Davidson P. Improving Access to Care in America: Individual and Contextual  
21 Indicators. . In: Andersen R, Rice T, Kominski G, editors. Changing the US Health Care System:  
22 Key Issues in Health Services Policy and Management San Francisco: Jossey-Bass; 2001.  
23  
24 39. Dyer T, Owens J, Robinson PG. The acceptability of care delegation in skill-mix: the salience of  
25 trust. Health Policy 2014;117(2):170-8.  
26  
27 40. Harris R. Operationalisation of the construct of access to dental care: a position paper and  
28 proposed conceptual definitions. Community Dent Health . 2013;30:94-101.  
29  
30  
31  
32  
33  
34  
35  
36  
37  
38  
39  
40  
41  
42  
43  
44  
45  
46  
47  
48  
49  
50  
51  
52  
53  
54  
55  
56  
57  
58  
59  
60

Figure 1: Andersen's Behavioural model of access (adapted from Baker<sup>26</sup>)

1  
2  
3 **Figure 1: Andersen's Behavioural model of access** (adapted from Baker <sup>26</sup>)  
4  
5  
6  
7

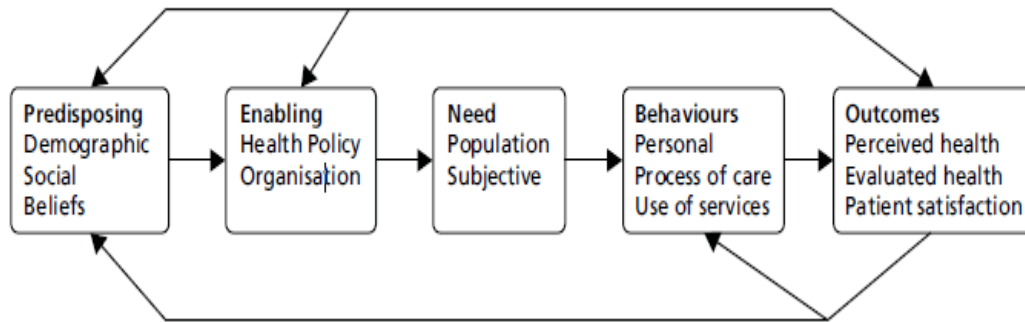

# BMJ Open

## Remuneration of primary dental care in England: A qualitative framework analysis of perspectives of a new service delivery model incorporating incentives for improved access, quality and health outcomes

|                                 |                                                                                                                                                                                                                                                                                                                                                                                                                                                                                                                   |
|---------------------------------|-------------------------------------------------------------------------------------------------------------------------------------------------------------------------------------------------------------------------------------------------------------------------------------------------------------------------------------------------------------------------------------------------------------------------------------------------------------------------------------------------------------------|
| Journal:                        | <i>BMJ Open</i>                                                                                                                                                                                                                                                                                                                                                                                                                                                                                                   |
| Manuscript ID                   | bmjopen-2019-031886.R1                                                                                                                                                                                                                                                                                                                                                                                                                                                                                            |
| Article Type:                   | Original research                                                                                                                                                                                                                                                                                                                                                                                                                                                                                                 |
| Date Submitted by the Author:   | 16-Aug-2019                                                                                                                                                                                                                                                                                                                                                                                                                                                                                                       |
| Complete List of Authors:       | Robinson, Peter; University of Bristol, School of Oral and Dental Sciences<br>Douglas, Gail; University of Leeds, School of Dentistry<br>Gibson, Barry; University of Sheffield, School of Clinical Dentistry<br>Godson, Jenny; Public Health England, Dental Public Health ; University of Leeds, School of Dentistry<br>Vinall-Collier, Karen; University of Leeds, School of Dentistry<br>Pavitt, Sue; University of Leeds, School of Dentistry<br>Hulme, Claire; University of Exeter, Health Economics Group |
| <b>Primary Subject Heading</b>: | Dentistry and oral medicine                                                                                                                                                                                                                                                                                                                                                                                                                                                                                       |
| Secondary Subject Heading:      | Health services research                                                                                                                                                                                                                                                                                                                                                                                                                                                                                          |
| Keywords:                       | Commissioning, dental, oral health, contract, incentives, behaviour change                                                                                                                                                                                                                                                                                                                                                                                                                                        |
|                                 |                                                                                                                                                                                                                                                                                                                                                                                                                                                                                                                   |

SCHOLARONE™  
Manuscripts

1  
2  
3  
4 **Remuneration of primary dental care in England: A qualitative framework analysis of**  
5 **perspectives of a new service delivery model incorporating incentives for improved**  
6 **access, quality and health outcomes**  
7  
8  
9

10  
11 Prof Peter Robinson, Bristol Dental School, University of Bristol, Bristol, UK  
12

13  
14 Prof Gail Douglas, School of Dentistry, University of Leeds, Leeds, UK  
15

16  
17 Dr Barry Gibson, School of Clinical Dentistry, University of Sheffield, Sheffield, UK  
18

19  
20 Dr Jenny Godson, Public Health England, Leeds, UK  
21

22  
23 Dr Karen Vinall-Collier, School of Dentistry, University of Leeds, Leeds, UK  
24

25  
26 Prof Sue Pavitt, School of Dentistry, University of Leeds, Leeds, UK  
27

28  
29 \*Prof Claire Hulme, Institute of Health Research, University of Exeter, Exeter, UK  
30

31  
32 **\*Corresponding author:** Prof Claire Hulme, Institute of Health Research, University of Exeter Medical  
33 School, St Luke's Campus, Exeter EX1 2LU. [c.t.hulme@exeter.ac.uk](mailto:c.t.hulme@exeter.ac.uk) 01392 72 2902  
34

35  
36  
37 Key words: Commissioning, Dental, Oral Health, Incentives, Behaviour Change  
38

39  
40 Word count: 4096  
41  
42  
43  
44  
45  
46  
47  
48  
49  
50  
51  
52  
53  
54  
55  
56  
57  
58  
59  
60

## Abstract

Objective: To describe stakeholder perspectives of a new service delivery model in primary care dentistry incorporating incentives for access, quality and health outcomes

Design: Observations, interviews and focus groups

Setting: Six UK primary dental care practices, three working under the incentive-driven contract and three working under the traditional activity based contract

Participants: Observations were made of 30 dental appointments. Eighteen lay people, 15 dental team staff and a member of a commissioning team took part in the interviews and focus groups.

Results: Using a qualitative framework analysis informed by Andersen's model of access we found oral health assessments influenced patients' perceptions of need, which led to changes in preventive behaviour. Dentists' responded to the contract, with greater emphasis on prevention, use of the disease risk ratings in treatment planning, adherence to the pathways and the utilisation of skill-mix. Participants identified increases in the capacity of practices to deliver more care as a result. These changes were seen to improve evaluated and perceived health and patient satisfaction. These outcomes fed back to shape people's predispositions to visit the dentist.

Conclusion: The incentive driven contract was perceived to increase access to dental care, determine dentists' and patients' perceptions of need, their behaviours, health outcomes and patient satisfaction. Dentists face challenges in refocussing care, perceptions of preventive dentistry, deployment of skill mix and use of the risk assessments and care pathways. Dentists may need support in these areas and to recognise the differences between caring for individual patients and the patient-base of a practice.

### Strengths and limitations of this study

- Whilst participant numbers are modest, staff were purposively sampled across a range of skill mix so similar numbers were observed
- Patients and 'non-patients' were recruited – the latter to include people who may not engage with local dental care services
- There will inevitably be a degree of bias given that all the practices were self-selected
- The model of access was broadly sustained in the data but might be enhanced by greater conceptual clarity
- Although the new practices increased access, further work is required to understand how best to promote and encourage appropriate dental service attendance

## Introduction

Commissioning of National Health Service (NHS) dentistry in England is moving away from volume-based contracts with payment for units of dental activity (UDA) to an approach that rewards quality and oral health improvement alongside activity<sup>1</sup>. Payments recognise prevention and reward the contribution of the dental team to improved oral health, reflected in patient progression along care pathways, adherence to nationally agreed clinical guidelines and the achievement of expected outcomes<sup>1</sup>. The Department of Health and Social Care (DHSC) dental contract reform programme opened a series of pilots in 2011, subsequently followed by on-going prototype systems, to explore a shift from treatment and repair to prevention and improved oral health via a new clinical pathway and new remuneration models<sup>2,3</sup>. Whilst the impact of these contracts on process has been investigated, limited evidence exists on their effect on oral health outcomes and patient, commissioner and workforce acceptability.

The care pathway in the pilots and prototypes begins with an oral health assessment (OHA)<sup>3,4</sup> designed to enable more prevention within personalised care plans, taking into account patients' social and dental histories and clinical status. Patients are then advised of their oral risk status using a red/amber/green rating (RAG) rating, given preventive advice and a follow up or review based on their risk status. The RAG tool allows dentists to perform detailed and consistent assessments that, in turn, direct delivery of care appropriate to needs and aids communication with patients. Evaluation of the pilots reported patient and practitioners views of the new clinical pathway to be strongly supportive<sup>5</sup>. However, evidence on the effectiveness of use of contracting and incentives in health providers is still emerging and is mixed.<sup>6-9</sup> Within dentistry, changes to incentive structures, towards a fee for service model increased activity and influenced dentists to target UDAs by shifting towards treatments with high rewards rather than prescribing on the basis of need<sup>10,11</sup>. However, a recent review found low level evidence and concluded that changes to remuneration may change clinical activity in primary care dentistry but further experimental research is needed<sup>12</sup>. Furthermore, there is little literature regarding care pathways in primary dental care<sup>13</sup>. Findings from the national dental contract pilots, suggested small improvements in risk reduction over the short-term<sup>14</sup>. The new prototypes are undergoing evaluation<sup>14</sup>.

Another potential advantage of a new dental contract would be more effective use of skill-mix. Dental hygienists/therapists may provide treatments such as scaling and polishing, oral health promotion, fissure sealants and fillings on all patients and pulp treatment/stainless steel crowns and extractions

1  
2  
3 on children. The potential contribution of dental therapists to reduce costs and increase access to care  
4 is considerable. Whilst there are few hard data to support skill-mix in dentistry<sup>15</sup>, approximately 60 –  
5 70% of dentists are prepared to consider employing a therapist although some dentists remain unclear  
6 of their roles<sup>16-18</sup>.  
7  
8  
9

10  
11  
12 In 2007 a new incentive-driven contract (INCENTIVE) intended to promote evidence-based preventive  
13 interventions, widen access to dentistry and encourage the use of skill mix (skill-mix in dentistry  
14 describes a model which might include, for example dentists, dental therapists, dental hygienists and  
15 dental nurses) was introduced in three primary care dental practices in West Yorkshire. The practices  
16 were in areas of high oral health need and with high demand for NHS dental care. Whilst it pre-dated  
17 the national dental contract pilots and prototypes, the specification of the INCENTIVE model reflected  
18 the same ethos and recommendations, with several features identical. Like the prototypes, the  
19 INCENTIVE model blended incentives to demonstrate quality, oral health improvements and volume  
20 of service. Most of its contract value (60%) was attributed to the delivery of UDAs, with the remainder  
21 equally divided between quality (including systems, processes and infrastructure) and oral health  
22 improvement via implementation of Delivering Better Oral Health<sup>19</sup>. The model also employed the  
23 same OHA care pathway.  
24  
25  
26  
27  
28  
29  
30  
31  
32  
33

34  
35 Our overall aim was to evaluate the incentive driven model of dental service provision implemented  
36 in West Yorkshire in the North of England. Our objectives were to (i) explore stakeholder perspectives  
37 of the new service delivery model, (ii) assess its effectiveness and (iii) assess its cost-effectiveness.  
38 This manuscript reports on the first objective; details of the effectiveness and cost effectiveness  
39 evaluation can be found elsewhere<sup>20-21</sup>.  
40  
41  
42  
43  
44

## 45 **Methods**

46  
47 This qualitative study focused on the three INCENTIVE practices and three comparator dental practices  
48 working under traditional UDA contracts (TRADITIONAL practices). The TRADITIONAL were matched  
49 with the INCENTIVE practices by deprivation index, age profile, size of practice and ethnicity.  
50  
51  
52

53  
54 Data were collected in focus groups and semi-structured interviews, supplemented with observations  
55 of dental appointments of the delivery of dental care. Purposive sampling via a sampling matrix  
56 supported recruitment of participants with different experiences of the model. The three stakeholders  
57 groups were lay people (patients and non-patients), dental teams (dental practitioners, dental care  
58  
59  
60

1  
2  
3 professionals and practice managers) and a service commissioner. The sampling matrix for the public  
4 and patient group included criteria linked to demographic factors (age, gender, ethnicity,  
5 socioeconomic status), risk category and treatment need.  
6  
7

8  
9 Encounters were observed in two INCENTIVE and two TRADITIONAL practices. Staff were sampled so  
10 that similar numbers (15 each) of dentists and dental hygienist/ therapists were observed. All eligible  
11 adult patients (18 years or over) with appointments on the observation day were invited to participate.  
12 Two weeks before their appointments, patients were sent a letter informing them of the study, a study  
13 information leaflet and consent form. Patients who expressed interest in participating were given the  
14 opportunity to ask any questions and give consent on the day of their appointment. The 'non-  
15 participant' observer (a researcher whose background lies in sociology) attended all appointments  
16 passively at a distance close enough to hear the conversation to take comprehensive field notes. A brief  
17 analysis of observations was conducted as soon as possible after the observation (the same or  
18 following day).  
19  
20  
21  
22  
23  
24  
25

26 Observations were followed by interviews on the same day with four dentists and four dental  
27 hygienists/therapists. Staff commented on the encounters and shared their views on what had taken  
28 place. Questions asked at the post-observation interview were influenced by the nature of the activity  
29 in the encounters, the team member's attitude, expectations and impressions and reflections of the  
30 experience. Interviews were recorded and transcribed verbatim.  
31  
32  
33  
34  
35

36 Interviews were also conducted with patients, other lay people, commissioners and dental team  
37 members. Lay people were recruited in two ways: (i) practices mailed information packs to patients;  
38 (ii) Focus groups were held with groups attending a community centre, including one for parents with  
39 young children and another for older residents. In addition, snowball sampling entailed existing  
40 participants passing the study information and the researcher's contact details on to acquaintances.  
41 Participants should be aged 16 years and over. People with no natural teeth were excluded.  
42  
43  
44  
45  
46

47 Interviews and focus groups followed a topic guide, partly informed by the theoretical framework and  
48 supplemented with themes that emerged from the observations and previous interviews. Interviews  
49 with dental team members took place at the dental surgery, while interviews with patients took place  
50 in patients' homes. All were recorded and transcribed verbatim. Interviews lasted between 15 and 70  
51 minutes.  
52  
53  
54  
55

56 The Andersen Behavioural model of access was employed as the theoretical framework for the  
57 qualitative analysis (Figure 1). The model sees access as *'the use of personal health services and  
58 everything that facilitates or impedes their use'*<sup>22</sup>.  
59  
60



1  
2  
3 The model has evolved in line with advances in understanding to incorporate the interaction between  
4 individual, health care system and external environment<sup>22-24</sup>. Later versions introduced health and  
5 patient satisfaction as desirable outcomes, said to be determined by predisposing and enabling factors,  
6 behaviours and need. Many studies in health care, including dentistry, support its use<sup>25-26</sup>.  
7  
8  
9

10  
11  
12  
13 **FIGURE 1 HERE**  
14  
15  
16  
17  
18  
19

20  
21 People may be predisposed to accessing care as a result of their demographic factors, social  
22 environment and beliefs. Enabling factors include policies, facilities, staff finance, and the organisation  
23 of services that might influence utilisation<sup>24</sup>. From this perspective the INCENTIVE contract is an  
24 enabling factor with policy, financial and organisational facets<sup>1,3,19</sup>. Health needs may include health  
25 education, disease prevention, diagnosis, treatment, rehabilitation and palliative care. Andersen  
26 distinguished between evaluated (professionally defined, or normative) and perceived (personally  
27 defined or felt) need. In turn, these components could influence personal and professional health  
28 behaviours. Personal behaviours are activities that shape health status, such as oral hygiene, diet and  
29 tobacco use. Health service use is treated as behaviour in itself. Professional behaviours relate to  
30 processes such as health education, communication and prescribing. The maintenance and  
31 improvement of health should be the primary outcome of access, thus the outcomes are (patient)  
32 perceived and (clinician) evaluated health status and patient satisfaction. An important feature of the  
33 model is its recursive nature with feedback loops so that the outcomes of access may influence future  
34 predisposing and enabling factors, population needs and use of services.  
35  
36  
37  
38  
39  
40  
41  
42  
43

44  
45 Framework analysis was used to induce the results from the original accounts within the structured  
46 policy focus of the research<sup>27</sup>. Our intention was to explore the effect of the contract as an enabling  
47 factor, interacting with other stages of the model. While Andersen's model guided the analysis, it was  
48 refined as required to identify the thematic framework. Data were indexed and charted under  
49 subheadings derived from the framework to enable a process of constant comparison across themes  
50 and cases. Thus, the framework analysis served to either confirm or to challenge the model, with  
51 deviant case analysis used to add new categories or revise it. The validity of the findings was supported  
52 by discussion of interim and final results for triangulation and corrections with participants in focus  
53 groups. The results were also compared against existing knowledge, such as the evaluations of the  
54 NHS Dental Contract Pilots<sup>5</sup>.  
55  
56  
57  
58  
59  
60

1  
2  
3 Ethics approval was obtained from the National Research Ethics Service (NRES) Committee (London –  
4 Bromley, 12/LO/0205) on 5<sup>th</sup> April 2012.  
5  
6

### 7 ***Patient and Public Involvement (PPI)*** 8 9

10 Throughout the research cycle patient contributors worked as integral members of the research team  
11 from conception of the research idea to shape our research questions and aid delivery, project  
12 management and final data interpretation through to reporting. They ensured our research was of  
13 relevance to patients and the NHS. Specifically patient contributors: Helped identify and prioritise the  
14 research questions and develop the research design. (e.g. the sampling matrix was co-designed); were  
15 members of the study advisory group; and co-developed participant information leaflets and  
16 dissemination materials.  
17  
18  
19  
20  
21  
22  
23

### 24 **Results** 25 26

27 Data were collected between August 2012 and February 2014. Observations were made of 30 dental  
28 appointments. Eighteen lay people, 15 dental team staff (four traditional practice dentists, 8  
29 INCENTIVE dentists, 2 practice managers and a dental therapist) and a member of the commissioning  
30 team took part in the interviews and focus groups. The results are presented in two stages. First, the  
31 major themes in the data are outlined. Secondly, the interactions between enabling and other factors  
32 are described.  
33  
34  
35  
36

### 37 ***Major themes*** 38 39

40 The Andersen Framework was largely sustained in the data, with the only revision being the addition  
41 of trust as an outcome of access. Predisposing factors could be characterised as demographic and  
42 social characteristics and beliefs. For example, family commitment could facilitate or hamper service  
43 utilisation. Enabling factors fell into three sub themes of health policy, finance and organisations. The  
44 influence of health policy between the extremes of the changes associated with implementation of  
45 the INCENTIVE model right through to an apparent lack of policy in some TRADITIONAL practices. A  
46 key part of the contract was dentists' remuneration. Traditional models were problematic for complex  
47 cases, whereas INCENTIVE practices focused on the costs of OHAs and building relationships with  
48 patients that would enable more prevention. Computing problems featured as organisational factors,  
49 and in particular the practice software, which had not been adapted to INCENTIVE.  
50  
51  
52  
53  
54  
55  
56  
57  
58  
59  
60

1  
2  
3 Evaluated and environmental need and population health indicators were manifest in the data. Two  
4 localities in the study are characterised by material deprivation, poor oral health and long-standing  
5 under-supply of care. Unsurprisingly, this influenced dental treatment needs.  
6  
7

8  
9 An example of professional behaviour involved formally assessing patients' risk of disease. Dental  
10 team members commented on the relative imprecision of the traffic light (RAG) system and its three  
11 categories. Indeed attitudes and practices towards prevention varied appreciably among the dental  
12 teams with one dentist noting: *I do find it hard to talk about their health – I'm trained to drill and fill.*  
13  
14

15  
16 Health outcomes and satisfaction appeared in the data, as did the concept of trust. One INCENTIVE  
17 patient noted: *I do trust them here – they treated me, gave me root canal treatment and saved my*  
18 *tooth, without them, I'd have been minus a few teeth and my appearance would not have been*  
19 *good.*  
20  
21  
22

### 23 **Interactions**

24  
25 The INCENTIVE contract changes the finance and organisation of dental practices to implement  
26 health policy. Its effects can therefore be seen as interactions between these enabling factors and  
27 other stages in the model. This can be seen in enabling and pre-disposing factors and need.  
28  
29 INCENTIVE practices had been located based on "*a robust oral health needs assessment prior to*  
30 *commissioning these practices and we'd looked very closely at equity in terms of access to dental*  
31 *care*" (Service Commissioner). For some participants, the INCENTIVE practices marked a shift from  
32 *no dental care, whereas others moved from private to NHS provision. The new services suited*  
33 *participants' needs in terms of location, personnel and ease of getting an appointment.*  
34  
35  
36  
37  
38  
39

40  
41 Effects of the INCENTIVE contract were evident on the processes of care, personal health practices  
42 and the use of personal health resources. In turn, the process of delivering care appeared to be  
43 affected in three ways, 1] by the use of the care pathway underpinned by the risk assessment/ RAG;  
44 2] by increasing prevention communication and 3] multidisciplinary approach through wider use of  
45 skill mix. Of interest the communication of the RAG ratings was not always apparent in the  
46 observations and was being used solely by some of the clinicians to document progress.  
47  
48  
49

50  
51 Participants reflected on their experiences with the pathways. Benefits included the clear link  
52 between the risk assessment and care pathways. The INCENTIVE contract embedded DHSC guidance<sup>26</sup>  
53 so that prevention became valued standard procedure. Practitioners felt that it gave them time and  
54 space to care for patients. For example, one INCENTIVE dentist noted: *Red, amber or green and then*  
55 *they do get the fluoride varnish, the smoking cessation and alcohol use is being taken automatically.*  
56  
57  
58  
59  
60 This could be contrasted directly with the TRADITIONAL practices. There was an example of where the

1  
2  
3 focus of care in the incentive contract had penetrated a TRADITIONAL practice, causing them to reflect  
4 on their processes of care: *We are pushed towards UDAs rather than improving oral health... The*  
5 *prevention emphasis is an issue – we are expected to talk about perio disease and smoking and diet*  
6 *and have to squeeze that in.*  
7  
8  
9

10 The INCENTIVE practices were not mandated to use multidisciplinary teams, but did so to deliver  
11 preventatively focused care. One approach was for dentists to examine patients and formulate  
12 treatment plans, but some practices did not deduct the value of the delegated treatment from dentists'  
13 incomes:  
14  
15  
16

17  
18 *They readily work with each other. I mean our therapist and the hygienist are generally busy*  
19 *the whole day, . . . we pay them on a fixed rate and the therapists are very happy with that*  
20 *because they've got full time work, they're busy, the associates are happy because they're*  
21 *not having to pay for them ..., the patients get benefit because they get access to a therapist,*  
22 *... it may cost more for us to do it but it's a more sensible way of running a business because*  
23 *everybody is working together for the same aim*  
24  
25  
26  
27  
28  
29

30 The new contractual arrangements were seen to influence personal health practices and the use of  
31 personal health resources. They also influenced outcomes of perceived and evaluated health and  
32 patient satisfaction. Moreover, the interactions could ripple throughout the model to have far-  
33 reaching effects. For example the RAG ratings could influence patients' perceptions of their own needs,  
34 leading to personal behaviour changes and satisfaction (an outcome). As one INCENTIVE patient said:  
35 *I think it's good because if you know, if someone says to you, you know on this rating you are more at*  
36 *risk, you're more likely to do something about it aren't you, as opposed to someone not saying anything*  
37 *to you...* For dentists use of the ratings to determine recall intervals liberated more time for the process  
38 of care and allowed observation of increased health but influenced patient satisfaction both positively  
39 and negatively which suggests a need to reconcile contrasting views: the ability to increase access and  
40 longer intervals between assessments. In a wholly positive example, one INCENTIVE patient satisfied  
41 with her own care encouraged her partner to attend so that professional behaviour enhanced  
42 satisfaction to change predisposing factors to increase access to care.  
43  
44  
45  
46  
47  
48  
49  
50  
51

## 52 Discussion

53  
54  
55

56 This study has described stakeholders' views of the INCENTIVE contracting arrangements. The ratings  
57 from OHAs influenced patients' perceptions of need, which led to changes in preventive behaviour.  
58 Dentists had responded to the contract in the desired direction with greater emphasis on prevention,  
59  
60

1  
2  
3 use of the ratings in treatment planning, adherence to the pathways and the utilisation of skill-mix.  
4 Participants identified increases in the capacity of practices to deliver more care as a result. These  
5 changes were seen to improve evaluated and perceived health and patient satisfaction. Although  
6 participant numbers were relatively modest, these findings are compatible with the first year  
7 evaluations of the NHS dental contract pilots where almost three quarters of patients said they had a  
8 better understanding of their oral health and had changed their behaviour<sup>5</sup>. Furthermore, analysis of  
9 OHAs and reviews suggested that RAG ratings improved for small numbers of patients, within two  
10 years<sup>4</sup>. Better health and satisfaction increased the predisposition to visit the dentist. These findings  
11 demonstrate the potential for a new contract to increase access and to improve health.  
12  
13  
14  
15  
16  
17  
18

19 Whilst these data are encouraging for continued contract reform, several areas were identified as  
20 requiring more consideration, where NHS England, dental teams and the public may need more  
21 support. The practices had been placed in areas of high need. As well as meeting immediate needs,  
22 the *perception* of low availability of care may also be a barrier to access in areas that have been  
23 underserved in the past. Evidence of new services is therefore needed to break this cycle. The results  
24 also demonstrate direct benefits of the needs-led local service commissioning of the 2006 dental  
25 contract<sup>28-29</sup>. Such local knowledge is less well utilised in the current NHS England single operating  
26 model for practice commissioning<sup>30</sup>, which may render the system less responsive.  
27  
28  
29  
30  
31  
32

33 Participants at INCENTIVE practices reported professional and lay preventive behaviours leading to  
34 better evaluated and perceived health. However, there were concerns over offering preventive advice,  
35 the complexities of accounting for the patient's context, the time this took and the difficulties of  
36 effective prevention, especially in areas with high levels of disease. These aspects of dentistry are  
37 often presented as problems, sometimes beyond the scope of practitioners, rather than part of their  
38 job<sup>16</sup>. This is a key issue if dentistry is to refocus on prevention. These and other data indicate that  
39 change is possible if it is encouraged by the right contractual model. Education may also be required  
40 to support contractual drivers. Neither one alone is likely to be sufficient. A Cochrane Review<sup>31</sup>  
41 concluded that educational meetings had a small effect on professional practice and health outcomes  
42 but the effects were likely to be smaller still for complex behaviours. Both a systematic review of  
43 incentives to follow best practice in health care and a Cochrane review of the effect of remuneration  
44 on primary care dentists' behaviour cited within it<sup>12,32</sup> concluded that financial incentives can have a  
45 'modest' effect on improving the quality of healthcare.  
46  
47  
48  
49  
50  
51  
52  
53  
54  
55

56 The emphasis on OHAs and pathways was a key feature of INCENTIVE and the DHSC contract pilots  
57 and subsequent prototypes<sup>5</sup>. Some patients were not aware of the RAG ratings; others perceived them  
58 to alert them to their preventive needs and to be a motivator. We specifically enquired about the RAG  
59  
60

1  
2  
3 ratings when triangulating the data in focus groups with dental staff. There was near universal use of  
4 the ratings as a decision aid (as evident in the data), but their use in patient communication had  
5 decreased over time. Dental teams may need clarification of whether and how the ratings are  
6 supposed to be communicated to patients. The small number of rating categories concerned some  
7 dentists, especially for patients with immutable risk factors such as general health problems. Dentists'  
8 concerns might be alleviated by the addition of new categories. Alternatively, they may become used  
9 to this system and gain confidence in over-riding the rules of the pathway. Their reluctance to do this  
10 may stem from the requirement to justify doing so. Dentists who engaged in the contract pilots  
11 requested reassurance about exercising clinical judgement in deviating from recommendations<sup>33</sup>, first  
12 that there would be no medico-legal repercussions provided there was evidence of clinical justification;  
13 and second, that they would not be penalised contractually.

14  
15  
16  
17  
18  
19  
20  
21  
22  
23  
24  
25  
26  
27  
28  
29  
30  
31  
32  
33  
34  
35  
36  
37  
38  
39  
40  
41  
42  
43  
44  
45  
46  
47  
48  
49  
50  
51  
52  
53  
54  
55  
56  
57  
58  
59  
60  
Dental therapists increased the availability of care and patient satisfaction. Whilst contract reform is  
seen to play a key role in use of wider dental team skill mix and enabling different models of care<sup>34</sup>  
use of skill-mix is exquisitely sensitive to contracting and practice finance<sup>35</sup> Practices had increased  
their utilisation of wider skill mix by not reducing the payments to dentists who delegated care. Paying  
two staff members for the shared treatment incentivised referral across the team and also liberated  
dentists' time for patient OHAs and more remunerative complex treatments. The impact of funding  
arrangements on dental practice is well known, and dentists must reconcile the business and other  
elements of their practices<sup>36</sup>. Dentists could see how the new contract carried the potential for  
greater value for money and reduce unnecessary treatment, but there were concerns that the time  
and costs of the OHAs had been under-estimated. This was also a concern in the dental contract pilots  
and was evident as reduced patient access<sup>33,37</sup>. This financial risk may be particularly relevant to new  
practices. The pilots were conducted in existing practices and experienced falls in access. However,  
the challenges may be even more severe in new practices (such as the INCENTIVE practices), where  
all the patients required initial assessments and were more likely to have high treatment needs  
necessitating more visits. This consideration goes further than dentists' incomes as concerns about  
costs were seen to influence practitioner behaviour. These concerns support the notion of assigning  
contract values according to patient needs, which in the contract prototypes is achieved by weighting  
the capitation element by patient characteristics of age and deprivation status<sup>37</sup>.

The Andersen Model provided a useful taxonomy for the data and allowed identification of the effects  
of the new contract. This fit is unsurprising as the model was developed over a forty-year period and  
remains amongst the most widely cited models of access to health care<sup>23,24,26,38</sup>. Theoretical models  
may be tested empirically or by looking for logical coherence<sup>39</sup>. The Andersen model is somewhat

1  
2  
3 general with overlapping dimensions and others (e.g. social capital) not explicitly incorporated<sup>26</sup>. Very  
4 little is said about how demographic variables may exert effects and why<sup>38</sup>. A new factor in these data  
5 ('Trust') is not explicit in the model but could be regarded as both a belief and an outcome of care<sup>39</sup>.  
6  
7 Dimensions also overlap in the model where dissimilar concepts are grouped together (personal  
8 health practices and health service use, perceived and evaluated health and satisfaction). This is  
9 important because empirical testing demands careful specification of inclusive relationships and to a  
10 certain extent this confounded testing of this model<sup>38</sup>. One consequence of this might be that the  
11 model yields very different results when cross national comparisons are made<sup>40</sup>.  
12  
13  
14  
15  
16

## 17 **Conclusion**

18  
19 The incentive-driven contract influenced access to dental care. Participants associated it with more  
20 access, greater use of skill mix and improved health outcomes. These outcomes fed back to shape  
21 predispositions to visit the dentist.  
22  
23

24  
25 The policy context in which the INCENTIVE study was funded has remained remarkably constant ever  
26 since. The Steele Report of 2009<sup>1</sup> advocated commissioning to align dentistry with the rest of NHS  
27 services and to commission for health outcomes; to develop contracts rewarding activity, quality and  
28 oral health improvement. It recommended that payments explicitly recognise prevention and reward  
29 the contribution of the dental team to improvements to oral health, reflected in patient progression  
30 along the pathway, adherence to clinical guidelines and the achievement of expected outcomes<sup>1</sup>. The  
31 contract prototypes now being tested<sup>37</sup> retain the same ethos of shifting NHS dentistry towards  
32 prevention and oral health rather than treatment and repair through a new clinical pathway and new  
33 remuneration models. Despite pre-dating the Steele report the INCENTIVE contracts were forerunners  
34 of these new incentive-driven contracts. Thus, our findings remain directly relevant to the evolution  
35 of the NHS dental contract.  
36  
37  
38  
39  
40  
41  
42  
43  
44  
45

## 46 **Acknowledgements**

47  
48 The study team would like to thank Mel Hall and Jenny Porritt, members of the study team involved  
49 in data collection and analysis. We would also like to thank the study participants. Department of  
50 Health disclaimer: this paper presents independent research commissioned by the National Institute  
51 of Health Research (NIHR). The views and opinions expressed by authors in this publication are those  
52 of the authors and do not necessarily reflect those of the NHS, the NIHR, Medical Research Council,  
53 Central Commissioning Facility, NIHR Evaluation, Trials Studies Co-ordinating Centre (NETSCC), the  
54 Health Services and Delivery Research programme or the Department of Health.  
55  
56  
57  
58  
59  
60



### Contributor-ship statement

Peter Robinson led the qualitative study. He designed the study, collected data, oversaw the analysis and interpretation and drafted the paper. Gail Douglas designed the study, collected data, and input to the interpretation and analysis and to the paper. Barry Gibson designed the study, collected data, and input to the interpretation and analysis and to the paper. Jenny Godson designed the study, input to the interpretation and analysis and to the paper. Karen Vinall-Collier designed the study, collected data, and input to the interpretation and analysis and to the paper. Sue Pavitt designed the study and input to the interpretation and analysis and to the paper. Claire Hulme was chief investigator for the overall study, designed the study and input to the interpretation and analysis and drafted the paper.

### Competing interests

All authors have completed the International Committee of Medical Journal Editors (ICMJE) uniform disclosure form at [http://www.icmje.org/coi\\_disclosure.pdf](http://www.icmje.org/coi_disclosure.pdf). Jenny Godson was employed within the Primary Care Trust commissioning the dental services during the conduct of the study; Claire Hulme and Sue Pavitt were on NIHR research boards during the conduct of the study . There were no other financial relationships with any organisations that might have an interest in the submitted work in the previous three years and no other relationships or activities that could appear to have influenced the submitted work.

### Funding

The research was funded by the National Institute for Health Research, Health Services and Delivery Research Programme. Project reference 09/1004/04

### Data sharing statement

Patient-level data are available from [peter.g.robinson@bristol.ac.uk](mailto:peter.g.robinson@bristol.ac.uk). Participant consent for data sharing was not obtained but the data are anonymised.

### References

1. Department of Health. NHS Dental Services in England. An independent review led by Professor Jimmy Steele. Department of Health London. 2009.
2. Department of Health. Dental Contract Reform: Prototypes. Overview Document. Department of Health: London. 2015 (January).
3. Department of Health. NHS Dental Contract: Proposals for Pilots. Department of Health London. 2010 (December).



- 1  
2  
3 4. Department of Health. NHS dental contract pilots - Learning after the first two years of  
4 piloting. Department of Health London. 2014(February).
- 5  
6 5. Department of Health. NHS dental contract pilots - Early findings. Department of Health  
7 London. 2012(October).
- 8  
9 6. Christianson J, Leatherman S, Sutherland K. Financial Incentives, Healthcare Providers and  
10 Quality Improvements. A review of the evidence. The Health Foundation: London. 2007.
- 11  
12 7. O'Donnell CA, Ring A, McLean G, Grant S, Guthrie B, Gabbay M, Mair FS, Carlisle C, Heaney D,  
13 Sutton M, Watt GCM, et al. The new GMS contract in primary care: the impact of governance  
14 and incentives on care. Final report. NIHR Service Delivery and Organisation programme;  
15 2011.
- 16  
17 8. Langdown C, Peckham S. The use of financial incentives to help improve health outcomes: is  
18 the quality and outcomes framework fit for purpose? A systematic review. Public Health.  
19 2014;36:251-8.
- 20  
21 9. Maisey S, Steel N, Marsh R, Gillam S, Fleetcroft R, Howe A. Effects of payment for  
22 performance in primary care: qualitative interview study. J Health Serv Res Policy.  
23 2008;13(3):133-9.
- 24  
25 10. Tickle M, McDonald R, Franklin J, Aggarwal V, Milsom K, Reeves D. Paying for the wrong kind  
26 of performance? Financial incentives and behaviour changes in National Health Service  
27 dentistry 1992-2009. Community Dent Oral Epidemiol. 2011;39(5):465.
- 28  
29 11. Chalkley M. Incentives for Dentists in Public Service: Evidence from a Natural Experiment. J  
30 Public Adm Res Theory. 2010;20:i207-i23.
- 31  
32 12. Brocklehurst P, Price J, Glenny AM, Tickle M, Birch S, Mertz E, et al. The effect of different  
33 methods of remuneration on the behaviour of primary care dentists. Cochrane Database Syst  
34 Rev. 2013;Nov 6(11):CD009853.
- 35  
36 13. Hally JP, Pitts NB. Developing the first dental care pathway: the oral health assessment. Prim  
37 Dent Care. 2005;12(4):117-21.
- 38  
39 14. Department of Health. Dental Contract Reform: Evaluation of the first year of prototyping  
40 2016-2017. Department of Health: London. 2018 (May).
- 41  
42 15. Galloway J, Gorham J, Lambert M. The Professionals Complementary to Dentistry: A  
43 Systematic Review and Synthesis. London: University College London; 2002.
- 44  
45 16. Dyer T, Robinson PG. General Health Promotion in General Dental Practice – The Involvement  
46 of the Dental Team. Part 2 - A Qualitative and Quantitative Investigation of the Views of  
47 Practice Principals in South Yorkshire. Br Dent J. 2006;201(1):45-51.
- 48  
49  
50  
51  
52  
53  
54  
55  
56  
57  
58  
59  
60

- 1  
2  
3 17. Ross MK, Ibbetson RJ, Turner S. The acceptability of dually-qualified dental hygienist-  
4  
5 therapists to general dental practitioners in South-East Scotland. *Br Dent J.* 2007;202(3):146-  
6  
7 7.
- 8  
9 18. Nilchian F, Rodd HD, Robinson PG. Influences on dentists' decisions to refer paediatric patients  
10  
11 to dental hygienists and therapists for fissure sealants: a qualitative approach. *Br Dent J.*  
12  
13 2009;207:E13.
- 14  
15 19. Department of Health. Delivering better Oral Health - An evidence-based toolkit for  
16  
17 prevention. London: Department of Health. 2017.
- 18  
19 20. Hulme C, Robinson PG, Saloniki EC, Vinall-Collier K, Baxter PD, Douglas G, Gibson B, Godson  
20  
21 JH, Meads D. 2016. Shaping dental contract reform – a clinical and cost effectiveness  
22  
23 analysis of incentive-driven commissioning for improved oral health in primary dental care.  
24  
25 *BMJ Open* 2016;6:e013549 doi:10.1136/bmjopen-2016-013549
- 26  
27 21. Hulme C, Robinson P et al. INCENTIVE: Improving the organisation and delivery of dental  
28  
29 health care to patients – innovation in commissioning and delivery of primary dental care  
30  
31 service delivery and organisation. *NIHR HS&DR* 4(18) May 2016 DOI:  
32  
33 <http://dx.doi.org/10.3310/hsdr04180>
- 34  
35 22. Andersen RM, Davidson PL. Ethnicity, aging, and oral health outcomes: A conceptual  
36  
37 framework. *Adv Dent Res.* 1997;11(2):203-9.
- 38  
39 23. Andersen R. A behavioral model of families' use of health services. Chicago: Center for  
40  
41 Health Administration Studies, University of Chicago.; 1968
- 42  
43 24. Andersen R. Revisiting the Behavioral Model and Access to Medical Care: Does it Matter? *J*  
44  
45 *Health Soc Behav.* 1995;36(1):1-10.
- 46  
47 25. Goldsmith L. A Critical History of Andersen's Behavioral Model of Health Services Use: A  
48  
49 Reflection of How We Study Access to Health Care. *Academy of Health Services Research and*  
50  
51 *Health Policy.* 2002;19:6.
- 52  
53 26. Baker SR. Applying Andersen's behavioural model to oral health: what are the contextual  
54  
55 factors shaping perceived oral health outcomes? . *Community Dent Oral Epidemiol.*  
56  
57 2009;37(6):485-94.
- 58  
59 27. Ritchie J, Lewis J. *Qualitative Research Practice: A guide for Social Science Students and*  
60  
61 *Researchers.* Sage Publications Inc, London. 2003.
28. Department of Health. *NHS Dentistry: Options for Change.* Department of Health London.  
2002;B.
29. Department of Health. *Primary Dental Care Services: Implementation of Local Commissioning.*  
Department of Health: London. 2005.

- 1  
2  
3  
4  
5  
6  
7  
8  
9  
10  
11  
12  
13  
14  
15  
16  
17  
18  
19  
20  
21  
22  
23  
24  
25  
26  
27  
28  
29  
30  
31  
32  
33  
34  
35  
36  
37  
38  
39  
40  
41  
42  
43  
44  
45  
46  
47  
48  
49  
50  
51  
52  
53  
54  
55  
56  
57  
58  
59  
60
30. NHS Commissioning Board. Securing excellence in commissioning primary care. June 2012. <https://www.england.nhs.uk/wp-content/uploads/2012/06/ex-comm-pc.pdf> Accessed 19.2.19
  31. Forsetlund L, Bjorndal A, Rashidian A, Jamtvedt G, O'Brien MA, Wolf FM, Davis D, Odgaard-Jensen J, Oxman AD. . Continuing education meetings and workshops: effects on professional practice and health care outcomes. *Cochrane Database Syst Rev.* 2009;15(2).
  32. Schaffer SK Sussex J, Feng Y. Incentives to follow best practice in health care. Office of Health Economics: London. 2015.
  33. Department of Health. Dental Contract Reform Engagement Exercise: Detailed Findings. In: Health LDo, editor. 2015.
  34. Brocklehurst PR, Tickel M. Is Skill Mix Profitable in the Current NHS Dental Contract in England? *Br Dent J.* 2011;210:303-8.
  35. Harris R, Mosedale S., Garner J., Perkins E. What factors influence the use of contracts in the context of NHS dental practice? A systematic review of theory and logic model *Soc Sci Med.* 2014;108(2014):54-9.
  36. Department of Health. Dental Contract Reform: Prototypes Overview document. Department of Health: London 2015.
  37. Health Education England. 2019. The future oral and dental workforce for England. Liberating human resources to serve the population across the life-course. Health Education England: London. <https://www.hee.nhs.uk/sites/default/files/documents/FDWF%20Report%20-%207th%20March%202019.pdf> Accessed 29.7.19
  38. Andersen R, Davidson P. Improving Access to Care in America: Individual and Contextual Indicators. . In: Andersen R, Rice T, Kominski G, editors. *Changing the US Health Care System: Key Issues in Health Services Policy and Management* San Francisco: Jossey-Bass; 2001.
  39. Dyer T, Owens J, Robinson PG. The acceptability of care delegation in skill-mix: the salience of trust. *Health Policy* 2014;117(2):170-8.
  40. Harris R. Operationalisation of the construct of access to dental care: a position paper and proposed conceptual definitions. *Community Dent Health* . 2013;30:94-101.

1  
2  
3  
4  
5  
6  
7  
8  
9  
10  
11  
12  
13  
14  
15  
16  
17  
18  
19  
20  
21  
22  
23  
24  
25  
26  
27  
28  
29  
30  
31  
32  
33  
34  
35  
36  
37  
38  
39  
40  
41  
42  
43  
44  
45  
46  
47  
48  
49  
50  
51  
52  
53  
54  
55  
56  
57  
58  
59  
60

**Figure 1: Andersen’s Behavioural model of access** (adapted from Baker <sup>26</sup>)

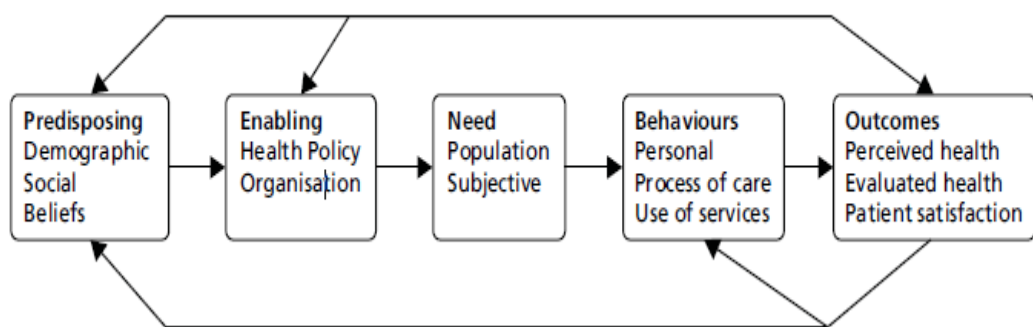

For peer review only

# Reporting checklist for qualitative study.

Based on the SRQR guidelines.

## Instructions to authors

Complete this checklist by entering the page numbers from your manuscript where readers will find each of the items listed below.

Your article may not currently address all the items on the checklist. Please modify your text to include the missing information. If you are certain that an item does not apply, please write "n/a" and provide a short explanation.

Upload your completed checklist as an extra file when you submit to a journal.

In your methods section, say that you used the SRQR reporting guidelines, and cite them as:

O'Brien BC, Harris IB, Beckman TJ, Reed DA, Cook DA. Standards for reporting qualitative research: a synthesis of recommendations. *Acad Med.* 2014;89(9):1245-1251.

|                     | Reporting Item                                                                                                                                                                                                                                          | Page Number |
|---------------------|---------------------------------------------------------------------------------------------------------------------------------------------------------------------------------------------------------------------------------------------------------|-------------|
| <b>Title</b>        |                                                                                                                                                                                                                                                         | 1           |
|                     | <a href="#">#1</a> Concise description of the nature and topic of the study identifying the study as qualitative or indicating the approach (e.g. ethnography, grounded theory) or data collection methods (e.g. interview, focus group) is recommended |             |
| <b>Abstract</b>     |                                                                                                                                                                                                                                                         | 2           |
|                     | <a href="#">#2</a> Summary of the key elements of the study using the abstract format of the intended publication; typically includes background, purpose, methods, results and conclusions                                                             |             |
| <b>Introduction</b> |                                                                                                                                                                                                                                                         | 3-4         |
| Problem formulation | <a href="#">#3</a> Description and significance of the problem / phenomenon studied: review of relevant theory and empirical work; problem statement                                                                                                    |             |

|    |                           |                     |                                                           |     |
|----|---------------------------|---------------------|-----------------------------------------------------------|-----|
| 1  | Purpose or research       | <a href="#">#4</a>  | Purpose of the study and specific objectives or           | 4   |
| 2  | question                  |                     | questions                                                 |     |
| 3  |                           |                     |                                                           |     |
| 4  | <b>Methods</b>            |                     |                                                           |     |
| 5  |                           |                     |                                                           |     |
| 6  |                           |                     |                                                           |     |
| 7  | Qualitative approach and  | <a href="#">#5</a>  | Qualitative approach (e.g. ethnography, grounded          | 4-6 |
| 8  | research paradigm         |                     | theory, case study, phenomenology, narrative              |     |
| 9  |                           |                     | research) and guiding theory if appropriate; identifying  |     |
| 10 |                           |                     | the research paradigm (e.g. postpositivist,               |     |
| 11 |                           |                     | constructivist / interpretivist) is also recommended;     |     |
| 12 |                           |                     | rationale. The rationale should briefly discuss the       |     |
| 13 |                           |                     | justification for choosing that theory, approach,         |     |
| 14 |                           |                     | method or technique rather than other options             |     |
| 15 |                           |                     | available; the assumptions and limitations implicit in    |     |
| 16 |                           |                     | those choices and how those choices influence study       |     |
| 17 |                           |                     | conclusions and transferability. As appropriate the       |     |
| 18 |                           |                     | rationale for several items might be discussed            |     |
| 19 |                           |                     | together.                                                 |     |
| 20 |                           |                     |                                                           |     |
| 21 |                           |                     |                                                           |     |
| 22 |                           |                     |                                                           |     |
| 23 |                           |                     |                                                           |     |
| 24 |                           |                     |                                                           |     |
| 25 |                           |                     |                                                           |     |
| 26 |                           |                     |                                                           |     |
| 27 | Researcher                | <a href="#">#6</a>  | Researchers' characteristics that may influence the       | 5   |
| 28 | characteristics and       |                     | research, including personal attributes, qualifications / |     |
| 29 | reflexivity               |                     | experience, relationship with participants,               |     |
| 30 |                           |                     | assumptions and / or presuppositions; potential or        |     |
| 31 |                           |                     | actual interaction between researchers'                   |     |
| 32 |                           |                     | characteristics and the research questions, approach,     |     |
| 33 |                           |                     | methods, results and / or transferability                 |     |
| 34 |                           |                     |                                                           |     |
| 35 |                           |                     |                                                           |     |
| 36 |                           |                     |                                                           |     |
| 37 |                           |                     |                                                           |     |
| 38 |                           |                     |                                                           |     |
| 39 | Context                   | <a href="#">#7</a>  | Setting / site and salient contextual factors; rationale  | 5   |
| 40 |                           |                     |                                                           |     |
| 41 | Sampling strategy         | <a href="#">#8</a>  | How and why research participants, documents, or          | 4-5 |
| 42 |                           |                     | events were selected; criteria for deciding when no       |     |
| 43 |                           |                     | further sampling was necessary (e.g. sampling             |     |
| 44 |                           |                     | saturation); rationale                                    |     |
| 45 |                           |                     |                                                           |     |
| 46 |                           |                     |                                                           |     |
| 47 |                           |                     |                                                           |     |
| 48 | Ethical issues pertaining | <a href="#">#9</a>  | Documentation of approval by an appropriate ethics        | 7   |
| 49 | to human subjects         |                     | review board and participant consent, or explanation      |     |
| 50 |                           |                     | for lack thereof; other confidentiality and data security |     |
| 51 |                           |                     | issues                                                    |     |
| 52 |                           |                     |                                                           |     |
| 53 |                           |                     |                                                           |     |
| 54 |                           |                     |                                                           |     |
| 55 | Data collection methods   | <a href="#">#10</a> | Types of data collected; details of data collection       | 4-7 |
| 56 |                           |                     | procedures including (as appropriate) start and stop      |     |
| 57 |                           |                     | dates of data collection and analysis, iterative          |     |
| 58 |                           |                     |                                                           |     |
| 59 |                           |                     |                                                           |     |
| 60 |                           |                     |                                                           |     |

|    |                              |                                                                           |      |
|----|------------------------------|---------------------------------------------------------------------------|------|
| 1  |                              | process, triangulation of sources / methods, and                          |      |
| 2  |                              | modification of procedures in response to evolving                        |      |
| 3  |                              | study findings; rationale                                                 |      |
| 4  |                              |                                                                           |      |
| 5  | Data collection              | <a href="#">#11</a> Description of instruments (e.g. interview guides,    | 5    |
| 6  | instruments and              | questionnaires) and devices (e.g. audio recorders)                        |      |
| 7  | technologies                 | used for data collection; if / how the instruments(s)                     |      |
| 8  |                              | changed over the course of the study                                      |      |
| 9  |                              |                                                                           |      |
| 10 |                              |                                                                           |      |
| 11 |                              |                                                                           |      |
| 12 | Units of study               | <a href="#">#12</a> Number and relevant characteristics of participants,  | 7    |
| 13 |                              | documents, or events included in the study; level of                      |      |
| 14 |                              | participation (could be reported in results)                              |      |
| 15 |                              |                                                                           |      |
| 16 |                              |                                                                           |      |
| 17 | Data processing              | <a href="#">#13</a> Methods for processing data prior to and during       | 6    |
| 18 |                              | analysis, including transcription, data entry, data                       |      |
| 19 |                              | management and security, verification of data                             |      |
| 20 |                              | integrity, data coding, and anonymisation /                               |      |
| 21 |                              | deidentification of excerpts                                              |      |
| 22 |                              |                                                                           |      |
| 23 |                              |                                                                           |      |
| 24 |                              |                                                                           |      |
| 25 |                              |                                                                           |      |
| 26 | Data analysis                | <a href="#">#14</a> Process by which inferences, themes, etc. were        | 5-6  |
| 27 |                              | identified and developed, including the researchers                       |      |
| 28 |                              | involved in data analysis; usually references a specific                  |      |
| 29 |                              | paradigm or approach; rationale                                           |      |
| 30 |                              |                                                                           |      |
| 31 |                              |                                                                           |      |
| 32 |                              |                                                                           |      |
| 33 | Techniques to enhance        | <a href="#">#15</a> Techniques to enhance trustworthiness and credibility | 6    |
| 34 | trustworthiness              | of data analysis (e.g. member checking, audit trail,                      |      |
| 35 |                              | triangulation); rationale                                                 |      |
| 36 |                              |                                                                           |      |
| 37 |                              |                                                                           |      |
| 38 | <b>Results/findings</b>      |                                                                           |      |
| 39 |                              |                                                                           |      |
| 40 | Syntheses and                | <a href="#">#16</a> Main findings (e.g. interpretations, inferences, and  | 7-9  |
| 41 | interpretation               | themes); might include development of a theory or                         |      |
| 42 |                              | model, or integration with prior research or theory                       |      |
| 43 |                              |                                                                           |      |
| 44 |                              |                                                                           |      |
| 45 |                              |                                                                           |      |
| 46 | Links to empirical data      | <a href="#">#17</a> Evidence (e.g. quotes, field notes, text excerpts,    | 7-9  |
| 47 |                              | photographs) to substantiate analytic findings                            |      |
| 48 |                              |                                                                           |      |
| 49 |                              |                                                                           |      |
| 50 | <b>Discussion</b>            |                                                                           |      |
| 51 |                              |                                                                           |      |
| 52 | Intergration with prior      | <a href="#">#18</a> Short summary of main findings; explanation of how    | 9-12 |
| 53 | work, implications,          | findings and conclusions connect to, support,                             |      |
| 54 | transferability and          | elaborate on, or challenge conclusions of earlier                         |      |
| 55 | contribution(s) to the field | scholarship; discussion of scope of application /                         |      |
| 56 |                              |                                                                           |      |
| 57 |                              |                                                                           |      |
| 58 |                              |                                                                           |      |
| 59 |                              |                                                                           |      |
| 60 |                              |                                                                           |      |

generalizability; identification of unique contributions(s) to scholarship in a discipline or field

1  
2  
3  
4 Limitations [#19](#) Trustworthiness and limitations of findings 9-12 & 2

5  
6 **Other**

7  
8 Conflicts of interest [#20](#) Potential sources of influence of perceived influence None  
9 on study conduct and conclusions; how these were  
10 managed  
11  
12

13  
14 Funding [#21](#) Sources of funding and other support; role of funders 12  
15 in data collection, interpretation and reporting  
16

17  
18 None The SRQR checklist is distributed with permission of Wolters Kluwer © 2014 by the Association  
19 of American Medical Colleges. This checklist can be completed online using  
20 <https://www.goodreports.org/>, a tool made by the [EQUATOR Network](#) in collaboration with  
21 [Penelope.ai](#)  
22  
23  
24  
25  
26  
27  
28  
29  
30  
31  
32  
33  
34  
35  
36  
37  
38  
39  
40  
41  
42  
43  
44  
45  
46  
47  
48  
49  
50  
51  
52  
53  
54  
55  
56  
57  
58  
59  
60
